# Supplementary material
Source: PubMed Central journal article supplement (PMC2667978)

**Supplemental Data**

**Mutations in the Gene Encoding the Calcium-Permeable  
Ion Channel TRPV4 Produce Spondylometaphyseal  
Dysplasia, Kozlowski Type and Metatropic Dysplasia**

**Deborah Krakow, Joris Vriens, Natalia Camacho, Phi Luong, Hannah Deixler, Tara  
L. Funari, Carlos A. Bacino, Mira B. Irons, Ingrid A. Holm, Laurie Sadler, Ericka  
B. Okenfuss, Annelies Janssens, Thomas Voets, David L. Rimoin, Ralph S.  
Lachman, Bernd Nilius, and Daniel H. Cohn**

Figure S1. TRPV4 mutations in SMDK and metatropic dysplasia.

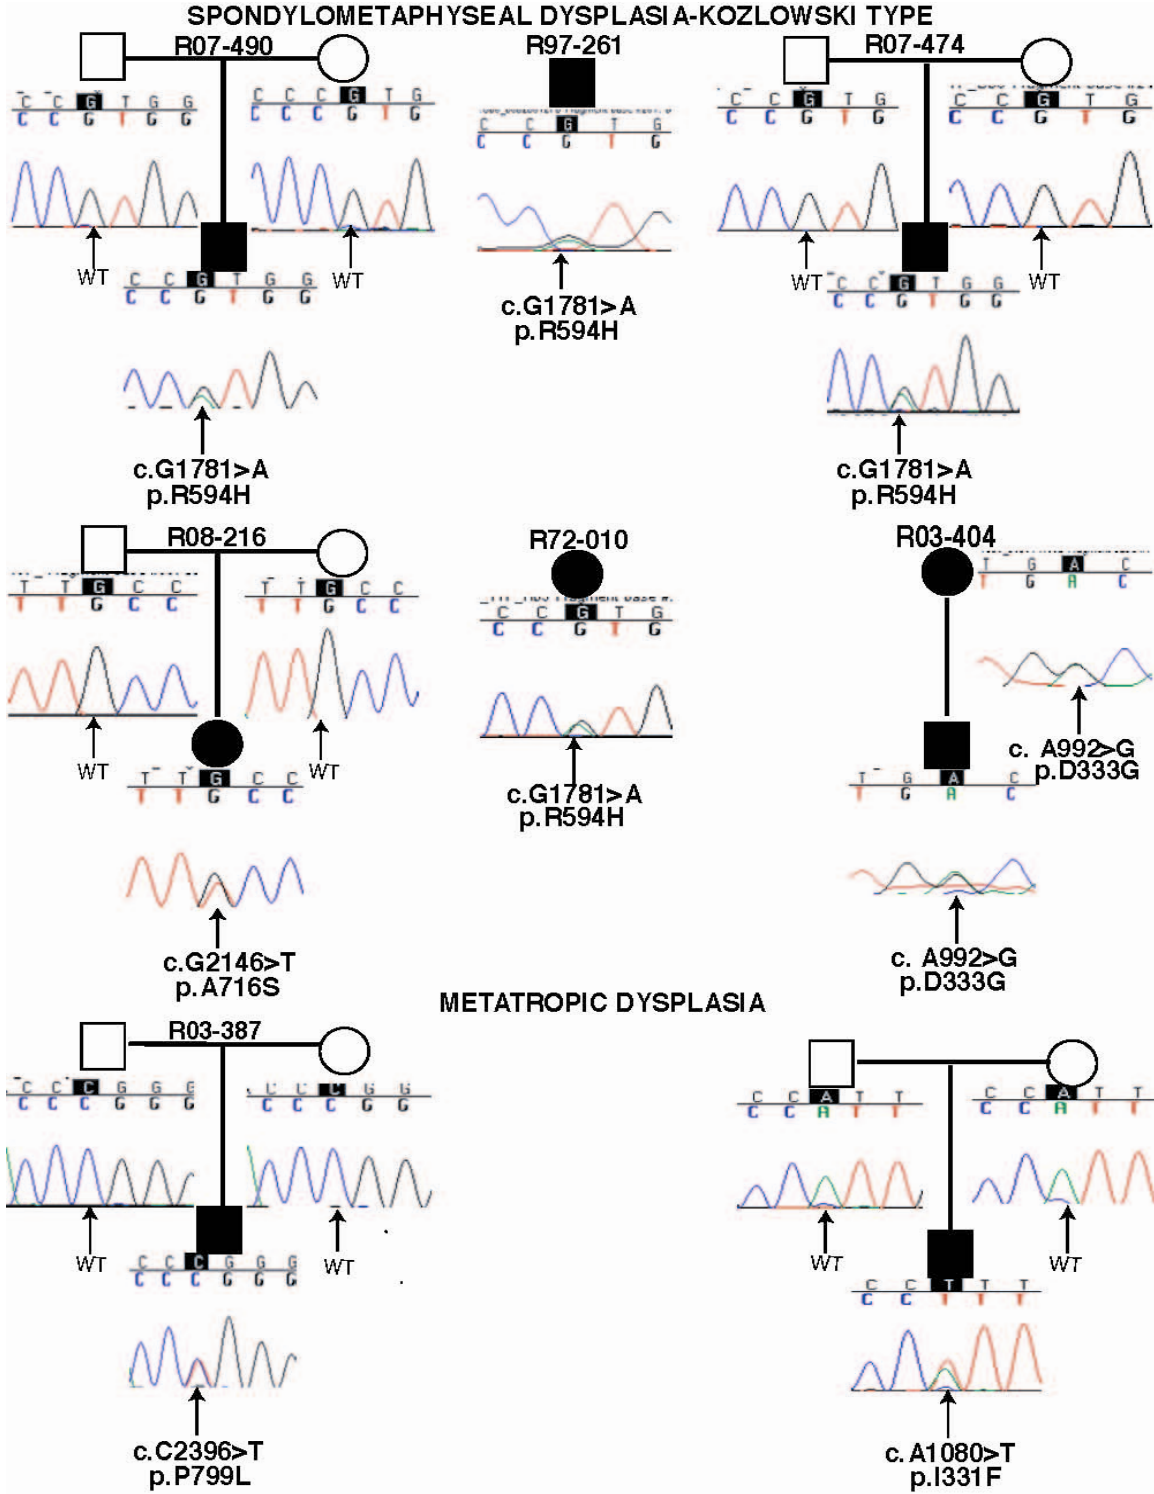

Figure S2. Activation of wild type and mutant TRPV4 by 4 $\alpha$ -PDD (A), hypotonic stimulation (HTS) (B) and arachidonic acid (AA) (C). Current-voltage relations obtained before (black) and after (red) stimulation with indicated stimulus. (D), maximal increases in in- and outward current at -150 and +150 mV on stimulation with 2 $\mu$ M 4 $\alpha$ PDD, hypotonic stimulation (E) and arachidonic acid (F). For every condition,  $n > 5$ . \*, significant differences when compared with cells expressing wild type TRPV4.

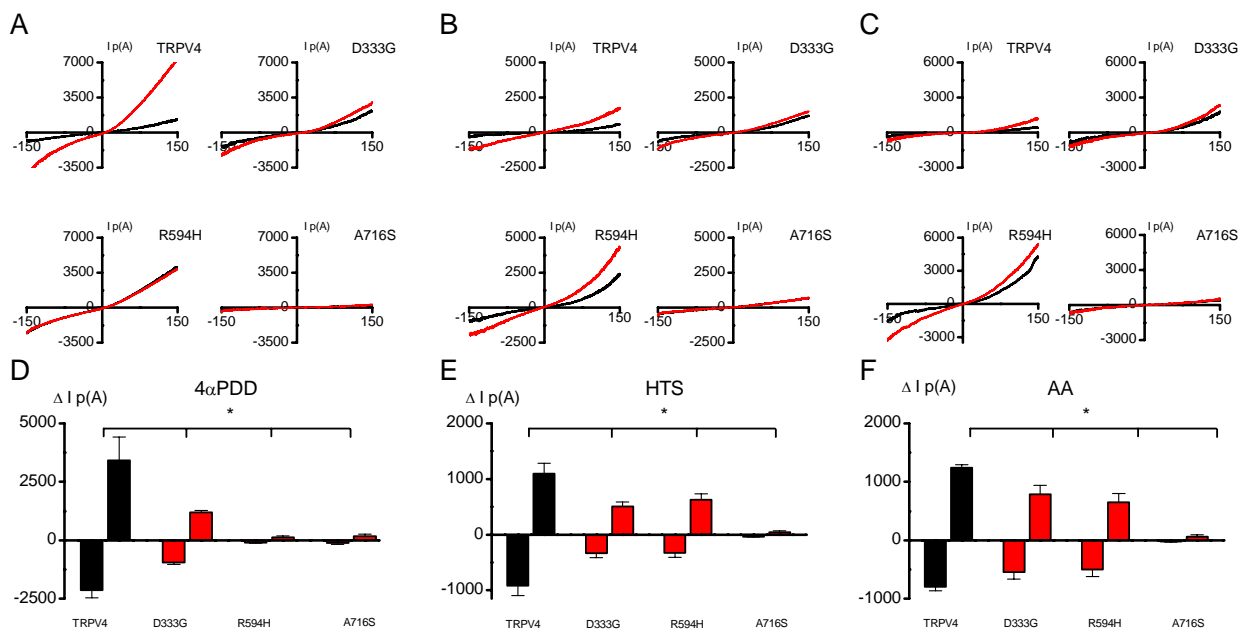

Figure S3. Influence of point mutations on TRPV4 activation by cell swelling and arachidonic acid. (A-D) effect of stimulation with a hypotonic solution on internal fluorescence ratio in wild type TRPV4 (A), D333G (B), R594H (C) and A716S (D) transfected HEK cells. (E-F), effect of stimulation with 10  $\mu$ M arachidonic acid on internal fluorescence ratio in wild type TRPV4 (E), D333G (F), R594H (G) and A716S (H) transfected HEK cells.  $n > 27$  in at least three independent recordings.

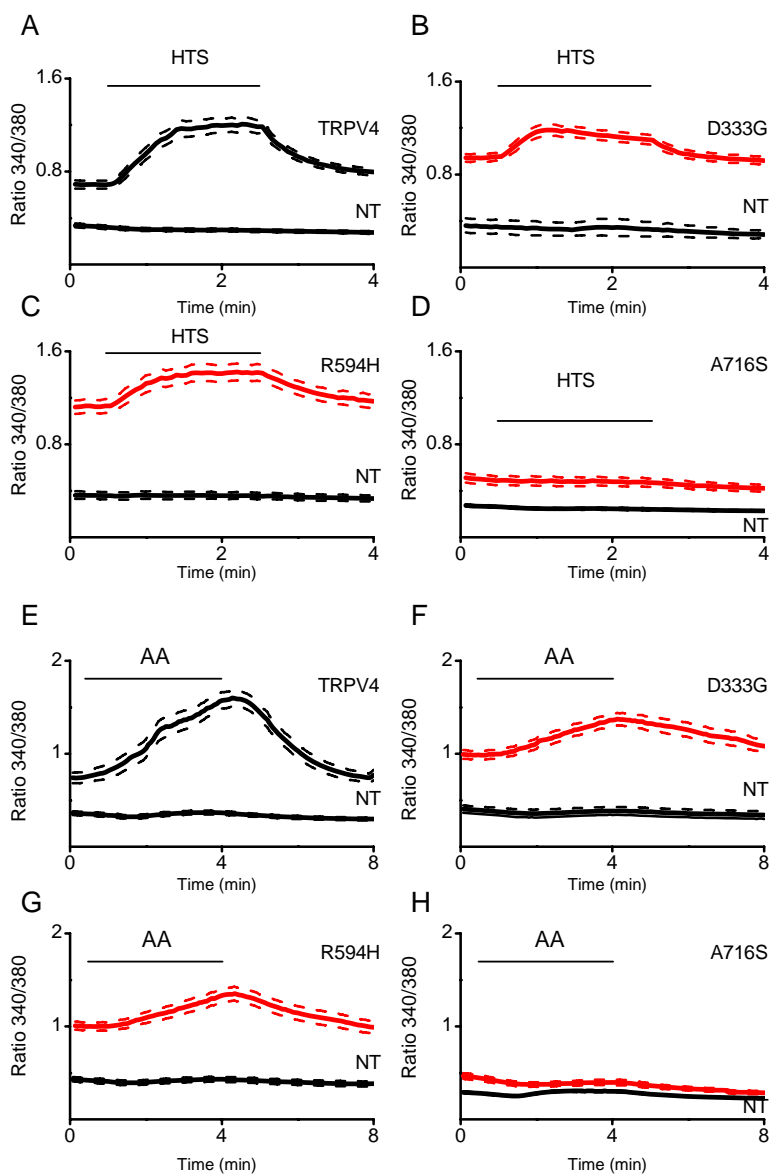

Supplement: mmc1.pdf [file mmc1.pdf]
